# Supplementary material
Source: MDPI journal article supplement (https://www.mdpi.com/2073-4441/15/22/3962)
Supplement: s1 [file s1]

Analysis of variance. One-way ANOVA.

Investigated experimental factor: The type of cation  
Factors name: Ni; Cd; Pb;  
Investigated experimental response: Total protein

\* - The components of observed variance:

|            | df | type I SS | mean square | F value | p>F    |
|------------|----|-----------|-------------|---------|--------|
| treatments | 2  | 109670.65 | 54835.324   | 21.3241 | <0.001 |
| Residuals  | 18 | 46287.38  | 2571.521    | -       | -      |

\* - Distribution of variables in variance classes:

|   | treatment | mean     | sd      | sem     | tukey | snk | duncan | NA. | scott_knott |
|---|-----------|----------|---------|---------|-------|-----|--------|-----|-------------|
| 1 | Cd        | 296.0420 | 53.0339 | 19.1666 | a     | a   | a      | a   | a           |
| 2 | Pb        | 255.8789 | 50.7239 | 19.1666 | a     | a   | a      | a   | a           |
| 3 | Ni        | 126.6586 | 48.2602 | 19.1666 | b     | b   | b      | b   | b           |

\* - The raw multiple comparisons test:

|   | pair contrast | p(tukey) | p(snk) | p(duncan) | NA     |
|---|---------------|----------|--------|-----------|--------|
| 1 | Cd - Pb       | 40.1631  | 0.3227 | 0.1557    | 0.1557 |
| 2 | Cd - Ni       | 169.3834 | 0.0000 | 0.0000    | 0.0000 |
| 3 | Pb - Ni       | 129.2203 | 0.0004 | 0.0002    | 0.0004 |

\* - Normality (Shapiro-Wilk) and homogeneity (Bartlett) tests applied to residuals:

|                              | values  |
|------------------------------|---------|
| p.value Shapiro-Wilk test    | 0.1794  |
| p.value Bartlett test        | 0.9755  |
| coefficient of variation (%) | 22.4200 |
| first value most discrepant  | 19.0000 |
| second value most discrepant | 9.0000  |
| third value most discrepant  | 4.0000  |

\* - The estimated marginal means (EMMs) of factors values:

|    | Concentration | emmean | SE   | df | lower.CL | upper.CL |
|----|---------------|--------|------|----|----------|----------|
| Ni |               | 127    | 19.2 | 18 | 86.4     | 167      |
| Cd |               | 296    | 19.2 | 18 | 255.8    | 336      |
| Pb |               | 256    | 19.2 | 18 | 215.6    | 296      |

Confidence level used: 0.95

\* - The contrasts between factors in terms of estimated marginal mMeans (EMMs):

|         | contrast | estimate | SE   | df | t.ratio | p.value |
|---------|----------|----------|------|----|---------|---------|
| Ni - Cd |          | -169.4   | 27.1 | 18 | -6.249  | <.0001  |
| Ni - Pb |          | -129.2   | 27.1 | 18 | -4.767  | 0.0002  |
| Cd - Pb |          | 40.2     | 27.1 | 18 | 1.482   | 0.1557  |

P value adjustment: fdr method for 3 tests

\* - Calculated p values of pair factor contrasts:

|         | contrasts.vals | p.vals       |
|---------|----------------|--------------|
| Ni - Cd | -169.38343     | 2.038614e-05 |
| Ni - Pb | -129.22029     | 2.310361e-04 |
| Cd - Pb | 40.16314       | 1.557090e-01 |

\* - Benjamini-Krieger-Yekutieli multiple-stages comparison procedure

\* and the decision to reject the null hypothesis of equal means.

|         | contrasts.vals | p.vals       | BYK.pvals    | BYK.rejection |
|---------|----------------|--------------|--------------|---------------|
| Ni - Cd | -169.38343     | 2.038614e-05 | 6.115967e-05 | TRUE          |
| Ni - Pb | -129.22029     | 2.310361e-04 | 2.310894e-04 | TRUE          |
| Cd - Pb | 40.16314       | 1.557090e-01 | 6.147526e-02 | FALSE         |
