# Supplementary material
Source: MDPI journal article supplement (https://www.mdpi.com/2073-4441/15/22/3962)
Supplement: s1 [file s1]

Analysis of variance. One-way ANOVA.

Investigated experimental factor: Pb Concentration  
Factors name: Control; 0.5 mg/L; 1.0 mg/L; 1.5 mg/L;  
Investigated experimental response: Dry biomass

\* - The components of observed variance:

|            | df | type I SS | mean square | F value | p>F    |
|------------|----|-----------|-------------|---------|--------|
| treatments | 3  | 168.7054  | 56.2351     | 84.2336 | <0.001 |
| Residuals  | 24 | 16.0226   | 0.6676      | -       | -      |

\* - Distribution of variables in variance classes:

|   | treatment | mean    | sd     | sem    | tukey | snk | duncan | NA. | scott_knott |
|---|-----------|---------|--------|--------|-------|-----|--------|-----|-------------|
| 1 | Control   | 22.8857 | 1.3656 | 0.3088 | a     | a   | a      | a   | a           |
| 2 | 0.5 mg/L  | 19.7486 | 0.7302 | 0.3088 | b     | b   | b      | b   | b           |
| 3 | 1.0 mg/L  | 17.3786 | 0.3696 | 0.3088 | c     | c   | c      | c   | c           |
| 4 | 1.5 mg/L  | 16.5714 | 0.3686 | 0.3088 | c     | c   | c      | c   | c           |

\* - The raw multiple comparisons test:

|   | pair                | contrast | p(tukey) | p(snk) | p(duncan) | NA     |
|---|---------------------|----------|----------|--------|-----------|--------|
| 1 | Control - 0.5 mg/L  | 3.1371   | 0.0000   | 0.0000 | 0.0000    | 0.0000 |
| 2 | Control - 1.0 mg/L  | 5.5071   | 0.0000   | 0.0000 | 0.0000    | 0.0000 |
| 3 | Control - 1.5 mg/L  | 6.3143   | 0.0000   | 0.0000 | 0.0000    | 0.0000 |
| 4 | 0.5 mg/L - 1.0 mg/L | 2.3700   | 0.0001   | 0.0000 | 0.0000    | 0.0000 |
| 5 | 0.5 mg/L - 1.5 mg/L | 3.1772   | 0.0000   | 0.0000 | 0.0000    | 0.0000 |
| 6 | 1.0 mg/L - 1.5 mg/L | 0.8072   | 0.2764   | 0.0769 | 0.0769    | 0.0769 |

\* - Normality (Shapiro-Wilk) and homogeneity (Bartlett) tests applied to residuals:

|                              | values  |
|------------------------------|---------|
| p.value Shapiro-Wilk test    | 0.3532  |
| p.value Bartlett test        | 0.0040  |
| coefficient of variation (%) | 4.2700  |
| first value most discrepant  | 7.0000  |
| second value most discrepant | 1.0000  |
| third value most discrepant  | 10.0000 |

\* - The estimated marginal means (EMMs) of factors values:

| Concentration | emmean | SE    | df | lower.CL | upper.CL |
|---------------|--------|-------|----|----------|----------|
| Control       | 22.9   | 0.309 | 24 | 22.2     | 23.5     |
| 0.5 mg/L      | 19.7   | 0.309 | 24 | 19.1     | 20.4     |
| 1.0 mg/L      | 17.4   | 0.309 | 24 | 16.7     | 18.0     |
| 1.5 mg/L      | 16.6   | 0.309 | 24 | 15.9     | 17.2     |

Confidence level used: 0.95

\* - The contrasts between factors in terms of estimated marginal mMeans (EMMs):

| contrast                | estimate | SE    | df | t.ratio | p.value |
|-------------------------|----------|-------|----|---------|---------|
| Control - (0.5 mg/L)    | 3.137    | 0.437 | 24 | 7.183   | <.0001  |
| Control - (1.0 mg/L)    | 5.507    | 0.437 | 24 | 12.610  | <.0001  |
| Control - (1.5 mg/L)    | 6.314    | 0.437 | 24 | 14.458  | <.0001  |
| (0.5 mg/L) - (1.0 mg/L) | 2.370    | 0.437 | 24 | 5.427   | <.0001  |
| (0.5 mg/L) - (1.5 mg/L) | 3.177    | 0.437 | 24 | 7.275   | <.0001  |
| (1.0 mg/L) - (1.5 mg/L) | 0.807    | 0.437 | 24 | 1.848   | 0.0769  |

P value adjustment: fdr method for 6 tests

\* - Calculated p values of pair factor contrasts:

|                         | contrasts.vals | p.vals       |
|-------------------------|----------------|--------------|
| Control - (0.5 mg/L)    | 3.1371429      | 3.016031e-07 |
| Control - (1.0 mg/L)    | 5.5071429      | 1.335309e-11 |
| Control - (1.5 mg/L)    | 6.3142857      | 1.448495e-12 |
| (0.5 mg/L) - (1.0 mg/L) | 2.3700000      | 1.700722e-05 |
| (0.5 mg/L) - (1.5 mg/L) | 3.1771429      | 3.016031e-07 |
| (1.0 mg/L) - (1.5 mg/L) | 0.8071429      | 7.694979e-02 |

```

*   - Benjamini-Krieger-Yekutieli multiple-stages comparison procedure
*   and the decision to reject the null hypothesis of equal means.
      contrasts.vals      p.vals      BYK.pvals BYK.rejection
Control - (0.5 mg/L)      3.1371429 3.016031e-07 4.021377e-07      TRUE
Control - (1.0 mg/L)      5.5071429 1.335309e-11 3.338274e-11      TRUE
Control - (1.5 mg/L)      6.3142857 1.448495e-12 8.690971e-12      TRUE
(0.5 mg/L) - (1.0 mg/L)   2.3700000 1.700722e-05 6.803002e-06      TRUE
(0.5 mg/L) - (1.5 mg/L)   3.1771429 3.016031e-07 4.021377e-07      TRUE
(1.0 mg/L) - (1.5 mg/L)   0.8071429 7.694979e-02 1.389412e-02      TRUE

```
