# Supplementary material
Source: MDPI journal article supplement (https://www.mdpi.com/2073-4441/15/22/3962)
Supplement: s1 [file s1]

Analysis of variance. One-way ANOVA.

Investigated experimental factor: Ni Concentration  
Factors name: Control; 0.5 mg/L; 1.0 mg/L; 1.5 mg/L;  
Investigated experimental response: Optical density

\* - The components of observed variance:

|            | df | type I SS | mean square | F value  | p>F    |
|------------|----|-----------|-------------|----------|--------|
| treatments | 3  | 14.7283   | 4.9094      | 159.1303 | <0.001 |
| Residuals  | 24 | 0.7404    | 0.0309      | -        | -      |

\* - Distribution of variables in variance classes:

|   | treatment | mean   | sd     | sem    | tukey | snk | duncan | NA. | scott_knott |
|---|-----------|--------|--------|--------|-------|-----|--------|-----|-------------|
| 1 | Control   | 1.9309 | 0.2400 | 0.0664 | a     | a   | a      | a   | a           |
| 2 | 0.5 mg/L  | 0.8889 | 0.2099 | 0.0664 | b     | b   | b      | b   | b           |
| 3 | 1.0 mg/L  | 0.1670 | 0.0699 | 0.0664 | c     | c   | c      | c   | c           |
| 4 | 1.5 mg/L  | 0.1539 | 0.1299 | 0.0664 | c     | c   | c      | c   | c           |

\* - The raw multiple comparisons test:

|   | pair contrast       | p(tukey) | p(snk) | p(duncan) | NA     |
|---|---------------------|----------|--------|-----------|--------|
| 1 | Control - 0.5 mg/L  | 1.0420   | 0.000  | 0.0000    | 0.0000 |
| 2 | Control - 1.0 mg/L  | 1.7639   | 0.000  | 0.0000    | 0.0000 |
| 3 | Control - 1.5 mg/L  | 1.7770   | 0.000  | 0.0000    | 0.0000 |
| 4 | 0.5 mg/L - 1.0 mg/L | 0.7219   | 0.000  | 0.0000    | 0.0000 |
| 5 | 0.5 mg/L - 1.5 mg/L | 0.7350   | 0.000  | 0.0000    | 0.0000 |
| 6 | 1.0 mg/L - 1.5 mg/L | 0.0131   | 0.999  | 0.8902    | 0.8902 |

\* - Normality (Shapiro-Wilk) and homogeneity (Bartlett) tests applied to residuals:

|                              | values  |
|------------------------------|---------|
| p.value Shapiro-Wilk test    | 0.1849  |
| p.value Bartlett test        | 0.0417  |
| coefficient of variation (%) | 22.3700 |
| first value most discrepant  | 9.0000  |
| second value most discrepant | 1.0000  |
| third value most discrepant  | 26.0000 |

\* - The estimated marginal means (EMMs) of factors values:

|          | Concentration | emmean | SE     | df | lower.CL | upper.CL |
|----------|---------------|--------|--------|----|----------|----------|
| Control  |               | 1.931  | 0.0664 | 24 | 1.7938   | 2.068    |
| 0.5 mg/L |               | 0.889  | 0.0664 | 24 | 0.7518   | 1.026    |
| 1.0 mg/L |               | 0.167  | 0.0664 | 24 | 0.0300   | 0.304    |
| 1.5 mg/L |               | 0.154  | 0.0664 | 24 | 0.0168   | 0.291    |

Confidence level used: 0.95

\* - The contrasts between factors in terms of estimated marginal mMeans (EMMs):

| contrast                | estimate | SE     | df | t.ratio | p.value |
|-------------------------|----------|--------|----|---------|---------|
| Control - (0.5 mg/L)    | 1.0420   | 0.0939 | 24 | 11.098  | <.0001  |
| Control - (1.0 mg/L)    | 1.7639   | 0.0939 | 24 | 18.787  | <.0001  |
| Control - (1.5 mg/L)    | 1.7770   | 0.0939 | 24 | 18.927  | <.0001  |
| (0.5 mg/L) - (1.0 mg/L) | 0.7219   | 0.0939 | 24 | 7.689   | <.0001  |
| (0.5 mg/L) - (1.5 mg/L) | 0.7350   | 0.0939 | 24 | 7.829   | <.0001  |
| (1.0 mg/L) - (1.5 mg/L) | 0.0131   | 0.0939 | 24 | 0.140   | 0.8898  |

P value adjustment: fdr method for 6 tests

\* - Calculated p values of pair factor contrasts:

|                         | contrasts.vals | p.vals       |
|-------------------------|----------------|--------------|
| Control - (0.5 mg/L)    | 1.04200000     | 1.236778e-10 |
| Control - (1.0 mg/L)    | 1.76385714     | 2.211442e-15 |
| Control - (1.5 mg/L)    | 1.77700000     | 2.211442e-15 |
| (0.5 mg/L) - (1.0 mg/L) | 0.72185714     | 7.591971e-08 |
| (0.5 mg/L) - (1.5 mg/L) | 0.73500000     | 6.931099e-08 |
| (1.0 mg/L) - (1.5 mg/L) | 0.01314286     | 8.898392e-01 |

```

*   - Benjamini-Krieger-Yekutieli multiple-stages comparison procedure
*   and the decision to reject the null hypothesis of equal means.

```

|                         | contrasts.vals | p.vals       | BYK.pvals    | BYK.rejection |
|-------------------------|----------------|--------------|--------------|---------------|
| Control - (0.5 mg/L)    | 1.04200000     | 1.236778e-10 | 1.649038e-10 | TRUE          |
| Control - (1.0 mg/L)    | 1.76385714     | 2.211442e-15 | 1.326865e-14 | TRUE          |
| Control - (1.5 mg/L)    | 1.77700000     | 2.211442e-15 | 1.326865e-14 | TRUE          |
| (0.5 mg/L) - (1.0 mg/L) | 0.72185714     | 7.591971e-08 | 5.198325e-08 | TRUE          |
| (0.5 mg/L) - (1.5 mg/L) | 0.73500000     | 6.931099e-08 | 5.198325e-08 | TRUE          |
| (1.0 mg/L) - (1.5 mg/L) | 0.01314286     | 8.898392e-01 | 1.000000e+00 | FALSE         |
