# Supplementary material
Source: MDPI journal article supplement (https://www.mdpi.com/2073-4441/15/22/3962)
Supplement: s1 [file s1]

Analysis of variance. One-way ANOVA.

Investigated experimental factor: Ni Concentration  
 Factors name: Control; 0.5 mg/L; 1.0 mg/L; 1.5 mg/L;  
 Investigated experimental response: pH of culture medium

\* - The components of observed variance:

|            | df | type I SS | mean square | F value | p>F    |
|------------|----|-----------|-------------|---------|--------|
| treatments | 3  | 0.0535    | 0.0178      | 8.1148  | <0.001 |
| Residuals  | 24 | 0.0528    | 0.0022      | -       | -      |

\* - Distribution of variables in variance classes:

|   | treatment | mean   | sd     | sem    | tukey | snk | duncan | NA. | scott_knott |
|---|-----------|--------|--------|--------|-------|-----|--------|-----|-------------|
| 1 | Control   | 9.3600 | 0.0597 | 0.0177 | a     | a   | a      | a   | a           |
| 2 | 0.5 mg/L  | 9.2686 | 0.0590 | 0.0177 | b     | b   | b      | b   | b           |
| 3 | 1.0 mg/L  | 9.2600 | 0.0283 | 0.0177 | b     | b   | b      | b   | b           |
| 4 | 1.5 mg/L  | 9.2514 | 0.0308 | 0.0177 | b     | b   | b      | b   | b           |

\* - The raw multiple comparisons test:

|   | pair contrast       | p(tukey) | p(snk) | p(duncan) | NA            |
|---|---------------------|----------|--------|-----------|---------------|
| 1 | Control - 0.5 mg/L  | 0.0914   | 0.0065 | 0.0013    | 0.0013 0.0052 |
| 2 | Control - 1.0 mg/L  | 0.1000   | 0.0028 | 0.0015    | 0.0007 0.0025 |
| 3 | Control - 1.5 mg/L  | 0.1086   | 0.0012 | 0.0012    | 0.0004 0.0012 |
| 4 | 0.5 mg/L - 1.0 mg/L | 0.0086   | 0.9857 | 0.7342    | 0.7342 1.0000 |
| 5 | 0.5 mg/L - 1.5 mg/L | 0.0172   | 0.9010 | 0.7732    | 0.5237 1.0000 |
| 6 | 1.0 mg/L - 1.5 mg/L | 0.0086   | 0.9857 | 0.7342    | 0.7342 1.0000 |

\* - Normality (Shapiro-Wilk) and homogeneity (Bartlett) tests applied to residuals:

|                              | values |
|------------------------------|--------|
| p.value Shapiro-Wilk test    | 0.8713 |
| p.value Bartlett test        | 0.1644 |
| coefficient of variation (%) | 0.5000 |
| first value most discrepant  | 7.0000 |
| second value most discrepant | 9.0000 |
| third value most discrepant  | 8.0000 |

\* - The estimated marginal means (EMMs) of factors values:

|  | Concentration | emmean | SE      | df | lower.CL | upper.CL |
|--|---------------|--------|---------|----|----------|----------|
|  | Control       | 9.360  | 0.01772 | 24 | 9.323    | 9.397    |
|  | 0.5 mg/L      | 9.269  | 0.01772 | 24 | 9.232    | 9.305    |
|  | 1.0 mg/L      | 9.260  | 0.01772 | 24 | 9.223    | 9.297    |
|  | 1.5 mg/L      | 9.251  | 0.01772 | 24 | 9.215    | 9.288    |

Confidence level used: 0.95

\* - The contrasts between factors in terms of estimated marginal mMeans (EMMs):

|  | contrast                | estimate | SE     | df | t.ratio | p.value |
|--|-------------------------|----------|--------|----|---------|---------|
|  | Control - (0.5 mg/L)    | 0.09143  | 0.0251 | 24 | 3.648   | 0.0026  |
|  | Control - (1.0 mg/L)    | 0.10000  | 0.0251 | 24 | 3.990   | 0.0016  |
|  | Control - (1.5 mg/L)    | 0.10857  | 0.0251 | 24 | 4.332   | 0.0014  |
|  | (0.5 mg/L) - (1.0 mg/L) | 0.00857  | 0.0251 | 24 | 0.342   | 0.7353  |
|  | (0.5 mg/L) - (1.5 mg/L) | 0.01714  | 0.0251 | 24 | 0.684   | 0.7353  |
|  | (1.0 mg/L) - (1.5 mg/L) | 0.00857  | 0.0251 | 24 | 0.342   | 0.7353  |

P value adjustment: fdr method for 6 tests

\* - Calculated p values of pair factor contrasts:

|                         | contrasts.vals | p.vals      |
|-------------------------|----------------|-------------|
| Control - (0.5 mg/L)    | 0.091428571    | 0.002552977 |
| Control - (1.0 mg/L)    | 0.100000000    | 0.001622399 |
| Control - (1.5 mg/L)    | 0.108571429    | 0.001363505 |
| (0.5 mg/L) - (1.0 mg/L) | 0.008571429    | 0.735346754 |
| (0.5 mg/L) - (1.5 mg/L) | 0.017142857    | 0.735346754 |
| (1.0 mg/L) - (1.5 mg/L) | 0.008571429    | 0.735346754 |

```

*   - Benjamini-Krieger-Yekutieli multiple-stages comparison procedure
*   and the decision to reject the null hypothesis of equal means.
      contrasts.vals      p.vals      BYK.pvals BYK.rejection
Control - (0.5 mg/L)      0.091428571 0.002552977 0.008192202      TRUE
Control - (1.0 mg/L)      0.100000000 0.001622399 0.008192202      TRUE
Control - (1.5 mg/L)      0.108571429 0.001363505 0.008192202      TRUE
(0.5 mg/L) - (1.0 mg/L)  0.008571429 0.735346754 1.000000000      FALSE
(0.5 mg/L) - (1.5 mg/L)  0.017142857 0.735346754 1.000000000      FALSE
(1.0 mg/L) - (1.5 mg/L)  0.008571429 0.735346754 1.000000000      FALSE

```
