# Supplementary material
Source: MDPI journal article supplement (https://www.mdpi.com/2073-4441/15/22/3962)
Supplement: s1 [file s1]

Analysis of variance. One-way ANOVA.

Investigated experimental factor: The type of cation  
Factors name: Ni; Cd; Pb;  
Investigated experimental response: Optical density

\* - The components of observed variance:

|            | df | type I SS | mean square | F value | p>F    |
|------------|----|-----------|-------------|---------|--------|
| treatments | 2  | 0.2132    | 0.1066      | 18.2698 | <0.001 |
| Residuals  | 18 | 0.1050    | 0.0058      | -       | -      |

\* - Distribution of variables in variance classes:

|   | treatment | mean   | sd     | sem    | tukey | snk | duncan | NA. | scott_knott |
|---|-----------|--------|--------|--------|-------|-----|--------|-----|-------------|
| 1 | Pb        | 0.3814 | 0.0788 | 0.0289 | a     | a   | a      | a   | a           |
| 2 | Cd        | 0.3800 | 0.0800 | 0.0289 | a     | a   | a      | a   | a           |
| 3 | Ni        | 0.1670 | 0.0699 | 0.0289 | b     | b   | b      | b   | b           |

\* - The raw multiple comparisons test:

|   | pair contrast | p(tukey) | p(snk) | p(duncan) | NA     |
|---|---------------|----------|--------|-----------|--------|
| 1 | Pb - Cd       | 0.0014   | 0.9994 | 0.9731    | 0.9731 |
| 2 | Pb - Ni       | 0.2144   | 0.0002 | 0.0002    | 0.0001 |
| 3 | Cd - Ni       | 0.2130   | 0.0002 | 0.0001    | 0.0001 |

\* - Normality (Shapiro-Wilk) and homogeneity (Bartlett) tests applied to residuals:

|                              | values  |
|------------------------------|---------|
| p.value Shapiro-Wilk test    | 0.0204  |
| p.value Bartlett test        | 0.9423  |
| coefficient of variation (%) | 24.6800 |
| first value most discrepant  | 12.0000 |
| second value most discrepant | 19.0000 |
| third value most discrepant  | 21.0000 |

\* - The estimated marginal means (EMMs) of factors values:

| Concentration | emmean | SE     | df | lower.CL | upper.CL |
|---------------|--------|--------|----|----------|----------|
| Ni            | 0.167  | 0.0289 | 18 | 0.106    | 0.228    |
| Cd            | 0.380  | 0.0289 | 18 | 0.319    | 0.441    |
| Pb            | 0.381  | 0.0289 | 18 | 0.321    | 0.442    |

Confidence level used: 0.95

\* - The contrasts between factors in terms of estimated marginal mMeans (EMMs):

| contrast | estimate | SE     | df | t.ratio | p.value |
|----------|----------|--------|----|---------|---------|
| Ni - Cd  | -0.21300 | 0.0408 | 18 | -5.217  | 0.0001  |
| Ni - Pb  | -0.21443 | 0.0408 | 18 | -5.252  | 0.0001  |
| Cd - Pb  | -0.00143 | 0.0408 | 18 | -0.035  | 0.9725  |

P value adjustment: fdr method for 3 tests

\* - Calculated p values of pair factor contrasts:

|         | contrasts.vals | p.vals       |
|---------|----------------|--------------|
| Ni - Cd | -0.213000000   | 8.720831e-05 |
| Ni - Pb | -0.214428571   | 8.720831e-05 |
| Cd - Pb | -0.001428571   | 9.724709e-01 |

\* - Benjamini-Krieger-Yekutieli multiple-stages comparison procedure

\* and the decision to reject the null hypothesis of equal means.

|         | contrasts.vals | p.vals       | BYK.pvals    | BYK.rejection |
|---------|----------------|--------------|--------------|---------------|
| Ni - Cd | -0.213000000   | 8.720831e-05 | 0.0002616477 | TRUE          |
| Ni - Pb | -0.214428571   | 8.720831e-05 | 0.0002616477 | TRUE          |
| Cd - Pb | -0.001428571   | 9.724709e-01 | 1.0000000000 | FALSE         |
