# Supplementary material
Source: MDPI journal article supplement (https://www.mdpi.com/2073-4441/15/22/3962)
Supplement: s1 [file s1]

Analysis of variance. One-way ANOVA.

Investigated experimental factor: Cd Concentration  
 Factors name: Control; 0.5 mg/L; 1.0 mg/L; 1.5 mg/L;  
 Investigated experimental response: Total protein

\* - The components of observed variance:

|            | df | type I SS | mean square | F value | p>F    |
|------------|----|-----------|-------------|---------|--------|
| treatments | 3  | 1180225.8 | 393408.607  | 40.8998 | <0.001 |
| Residuals  | 24 | 230852.3  | 9618.844    | -       | -      |

\* - Distribution of variables in variance classes:

|   | treatment | mean     | sd       | sem     | tukey | snk | duncan | NA. | scott_knott |
|---|-----------|----------|----------|---------|-------|-----|--------|-----|-------------|
| 1 | Control   | 773.8639 | 87.9719  | 37.0691 | a     | a   | a      | a   | a           |
| 2 | 0.5 mg/L  | 551.2071 | 151.6710 | 37.0691 | b     | b   | b      | b   | b           |
| 3 | 1.0 mg/L  | 296.0420 | 53.0339  | 37.0691 | c     | c   | c      | c   | c           |
| 4 | 1.5 mg/L  | 271.3711 | 70.1400  | 37.0691 | c     | c   | c      | c   | c           |

\* - The raw multiple comparisons test:

|   | pair contrast       | p(tukey) | p(snk) | p(duncan) | NA            |
|---|---------------------|----------|--------|-----------|---------------|
| 1 | Control - 0.5 mg/L  | 222.6568 | 0.0015 | 0.0003    | 0.0003 0.0006 |
| 2 | Control - 1.0 mg/L  | 477.8219 | 0.0000 | 0.0000    | 0.0000 0.0000 |
| 3 | Control - 1.5 mg/L  | 502.4928 | 0.0000 | 0.0000    | 0.0000 0.0000 |
| 4 | 0.5 mg/L - 1.0 mg/L | 255.1651 | 0.0003 | 0.0001    | 0.0001 0.0003 |
| 5 | 0.5 mg/L - 1.5 mg/L | 279.8360 | 0.0001 | 0.0001    | 0.0000 0.0000 |
| 6 | 1.0 mg/L - 1.5 mg/L | 24.6709  | 0.9648 | 0.6422    | 0.6422 0.6422 |

\* - Normality (Shapiro-Wilk) and homogeneity (Bartlett) tests applied to residuals:

|                              | values  |
|------------------------------|---------|
| p.value Shapiro-Wilk test    | 0.5264  |
| p.value Bartlett test        | 0.0723  |
| coefficient of variation (%) | 20.7300 |
| first value most discrepant  | 12.0000 |
| second value most discrepant | 10.0000 |
| third value most discrepant  | 11.0000 |

\* - The estimated marginal means (EMMs) of factors values:

| Concentration | emmean | SE   | df | lower.CL | upper.CL |
|---------------|--------|------|----|----------|----------|
| Control       | 774    | 37.1 | 24 | 697      | 850      |
| 0.5 mg/L      | 551    | 37.1 | 24 | 475      | 628      |
| 1.0 mg/L      | 296    | 37.1 | 24 | 220      | 373      |
| 1.5 mg/L      | 271    | 37.1 | 24 | 195      | 348      |

Confidence level used: 0.95

\* - The contrasts between factors in terms of estimated marginal mMeans (EMMs):

| contrast                | estimate | SE   | df | t.ratio | p.value |
|-------------------------|----------|------|----|---------|---------|
| Control - (0.5 mg/L)    | 222.7    | 52.4 | 24 | 4.247   | 0.0003  |
| Control - (1.0 mg/L)    | 477.8    | 52.4 | 24 | 9.115   | <.0001  |
| Control - (1.5 mg/L)    | 502.5    | 52.4 | 24 | 9.585   | <.0001  |
| (0.5 mg/L) - (1.0 mg/L) | 255.2    | 52.4 | 24 | 4.867   | 0.0001  |
| (0.5 mg/L) - (1.5 mg/L) | 279.8    | 52.4 | 24 | 5.338   | <.0001  |
| (1.0 mg/L) - (1.5 mg/L) | 24.7     | 52.4 | 24 | 0.471   | 0.6422  |

P value adjustment: fdr method for 6 tests

\* - Calculated p values of pair factor contrasts:

|                         | contrasts.vals | p.vals       |
|-------------------------|----------------|--------------|
| Control - (0.5 mg/L)    | 222.65671      | 3.379364e-04 |
| Control - (1.0 mg/L)    | 477.82186      | 8.730665e-09 |
| Control - (1.5 mg/L)    | 502.49271      | 6.701618e-09 |
| (0.5 mg/L) - (1.0 mg/L) | 255.16514      | 8.729353e-05 |
| (0.5 mg/L) - (1.5 mg/L) | 279.83600      | 3.540777e-05 |
| (1.0 mg/L) - (1.5 mg/L) | 24.67086       | 6.421716e-01 |

```

*   - Benjamini-Krieger-Yekutieli multiple-stages comparison procedure
*   and the decision to reject the null hypothesis of equal means.
      contrasts.vals      p.vals      BYK.pvals BYK.rejection
Control - (0.5 mg/L)      222.65671 3.379364e-04 1.352202e-04      TRUE
Control - (1.0 mg/L)      477.82186 8.730665e-09 4.020971e-08      TRUE
Control - (1.5 mg/L)      502.49271 6.701618e-09 4.020971e-08      TRUE
(0.5 mg/L) - (1.0 mg/L)   255.16514 8.729353e-05 6.547587e-05      TRUE
(0.5 mg/L) - (1.5 mg/L)   279.83600 3.540777e-05 4.721203e-05      TRUE
(1.0 mg/L) - (1.5 mg/L)    24.67086 6.421716e-01 2.991059e-01      FALSE

```
