# Supplementary material
Source: MDPI journal article supplement (https://www.mdpi.com/2073-4441/15/22/3962)
Supplement: s1 [file s1]

Analysis of variance. One-way ANOVA.

Investigated experimental factor: Cd Concentration  
Factors name: Control; 0.5 mg/L; 1.0 mg/L; 1.5 mg/L;  
Investigated experimental response: pH of culture medium

\* - The components of observed variance:

|            | df | type I SS | mean square | F value | p>F    |
|------------|----|-----------|-------------|---------|--------|
| treatments | 3  | 0.0915    | 0.0305      | 9.1297  | <0.001 |
| Residuals  | 24 | 0.0802    | 0.0033      | -       | -      |

\* - Distribution of variables in variance classes:

|   | treatment | mean | sd     | sem    | tukey | snk | duncan | NA. | scott_knott |
|---|-----------|------|--------|--------|-------|-----|--------|-----|-------------|
| 1 | Control   | 9.36 | 0.0597 | 0.0218 | a     | a   | a      | a   | a           |
| 2 | 0.5 mg/L  | 9.31 | 0.0896 | 0.0218 | ab    | ab  | ab     | ab  | a           |
| 3 | 1.0 mg/L  | 9.25 | 0.0300 | 0.0218 | bc    | bc  | bc     | bc  | b           |
| 4 | 1.5 mg/L  | 9.21 | 0.0294 | 0.0218 | c     | c   | c      | c   | b           |

\* - The raw multiple comparisons test:

|   | pair contrast       | p(tukey) | p(snk) | p(duncan) | NA     |
|---|---------------------|----------|--------|-----------|--------|
| 1 | Control - 0.5 mg/L  | 0.05     | 0.3858 | 0.1179    | 0.2358 |
| 2 | Control - 1.0 mg/L  | 0.11     | 0.0079 | 0.0043    | 0.0080 |
| 3 | Control - 1.5 mg/L  | 0.15     | 0.0003 | 0.0003    | 0.0006 |
| 4 | 0.5 mg/L - 1.0 mg/L | 0.06     | 0.2362 | 0.0634    | 0.1902 |
| 5 | 0.5 mg/L - 1.5 mg/L | 0.10     | 0.0170 | 0.0093    | 0.0140 |
| 6 | 1.0 mg/L - 1.5 mg/L | 0.04     | 0.5734 | 0.2068    | 0.2358 |

\* - Normality (Shapiro-Wilk) and homogeneity (Bartlett) tests applied to residuals:

|                              | values  |
|------------------------------|---------|
| p.value Shapiro-Wilk test    | 0.3655  |
| p.value Bartlett test        | 0.0218  |
| coefficient of variation (%) | 0.6200  |
| first value most discrepant  | 11.0000 |
| second value most discrepant | 7.0000  |
| third value most discrepant  | 13.0000 |

\* - The estimated marginal means (EMMs) of factors values:

| Concentration | emmean | SE      | df | lower.CL | upper.CL |
|---------------|--------|---------|----|----------|----------|
| Control       | 9.36   | 0.02185 | 24 | 9.315    | 9.405    |
| 0.5 mg/L      | 9.31   | 0.02185 | 24 | 9.265    | 9.355    |
| 1.0 mg/L      | 9.25   | 0.02185 | 24 | 9.205    | 9.295    |
| 1.5 mg/L      | 9.21   | 0.02185 | 24 | 9.165    | 9.255    |

Confidence level used: 0.95

\* - The contrasts between factors in terms of estimated marginal mMeans (EMMs):

| contrast                | estimate | SE     | df | t.ratio | p.value |
|-------------------------|----------|--------|----|---------|---------|
| Control - (0.5 mg/L)    | 0.05     | 0.0309 | 24 | 1.618   | 0.1424  |
| Control - (1.0 mg/L)    | 0.11     | 0.0309 | 24 | 3.560   | 0.0048  |
| Control - (1.5 mg/L)    | 0.15     | 0.0309 | 24 | 4.854   | 0.0004  |
| (0.5 mg/L) - (1.0 mg/L) | 0.06     | 0.0309 | 24 | 1.942   | 0.0960  |
| (0.5 mg/L) - (1.5 mg/L) | 0.10     | 0.0309 | 24 | 3.236   | 0.0070  |
| (1.0 mg/L) - (1.5 mg/L) | 0.04     | 0.0309 | 24 | 1.295   | 0.2078  |

P value adjustment: fdr method for 6 tests

\* - Calculated p values of pair factor contrasts:

|                         | contrasts.vals | p.vals       |
|-------------------------|----------------|--------------|
| Control - (0.5 mg/L)    | 0.05           | 0.1424352913 |
| Control - (1.0 mg/L)    | 0.11           | 0.0047639817 |
| Control - (1.5 mg/L)    | 0.15           | 0.0003607776 |
| (0.5 mg/L) - (1.0 mg/L) | 0.06           | 0.0959834550 |
| (0.5 mg/L) - (1.5 mg/L) | 0.10           | 0.0070337479 |
| (1.0 mg/L) - (1.5 mg/L) | 0.04           | 0.2077993438 |

\* - Benjamini-Krieger-Yekutieli multiple-stages comparison procedure  
 \* and the decision to reject the null hypothesis of equal means.

|                         | contrasts.vals | p.vals       | BYK.pvals   | BYK.rejection |
|-------------------------|----------------|--------------|-------------|---------------|
| Control - (0.5 mg/L)    | 0.05           | 0.1424352913 | 0.079630834 | FALSE         |
| Control - (1.0 mg/L)    | 0.11           | 0.0047639817 | 0.011966965 | TRUE          |
| Control - (1.5 mg/L)    | 0.15           | 0.0003607776 | 0.002165447 | TRUE          |
| (0.5 mg/L) - (1.0 mg/L) | 0.06           | 0.0959834550 | 0.079630834 | FALSE         |
| (0.5 mg/L) - (1.5 mg/L) | 0.10           | 0.0070337479 | 0.011966965 | TRUE          |
| (1.0 mg/L) - (1.5 mg/L) | 0.04           | 0.2077993438 | 0.079630834 | FALSE         |
