# Supplementary material
Source: MDPI journal article supplement (https://www.mdpi.com/2073-4441/15/22/3962)
Supplement: s1 [file s1]

Analysis of variance. One-way ANOVA.

Investigated experimental factor: Ni Concentration  
Factors name: Control; 0.5 mg/L; 1.0 mg/L; 1.5 mg/L;  
Investigated experimental response: Total protein

\* - The components of observed variance:

|            | df | type I SS | mean square | F value | p>F    |
|------------|----|-----------|-------------|---------|--------|
| treatments | 3  | 2482044   | 827347.851  | 160.853 | <0.001 |
| Residuals  | 24 | 123444    | 5143.502    | -       | -      |

\* - Distribution of variables in variance classes:

|   | treatment | mean     | sd      | sem     | tukey | snk | duncan | NA. | scott_knott |
|---|-----------|----------|---------|---------|-------|-----|--------|-----|-------------|
| 1 | Control   | 773.8639 | 87.9719 | 27.1069 | a     | a   | a      | a   | a           |
| 2 | 0.5 mg/L  | 604.8639 | 95.8620 | 27.1069 | b     | b   | b      | b   | b           |
| 3 | 1.0 mg/L  | 126.6586 | 48.2602 | 27.1069 | c     | c   | c      | c   | c           |
| 4 | 1.5 mg/L  | 86.7361  | 36.2820 | 27.1069 | c     | c   | c      | c   | c           |

\* - The raw multiple comparisons test:

|   | pair contrast       | p(tukey) | p(snk) | p(duncan) | NA            |
|---|---------------------|----------|--------|-----------|---------------|
| 1 | Control - 0.5 mg/L  | 169.0000 | 0.0010 | 0.0002    | 0.0002 0.0004 |
| 2 | Control - 1.0 mg/L  | 647.2053 | 0.0000 | 0.0000    | 0.0000 0.0000 |
| 3 | Control - 1.5 mg/L  | 687.1278 | 0.0000 | 0.0000    | 0.0000 0.0000 |
| 4 | 0.5 mg/L - 1.0 mg/L | 478.2053 | 0.0000 | 0.0000    | 0.0000 0.0000 |
| 5 | 0.5 mg/L - 1.5 mg/L | 518.1278 | 0.0000 | 0.0000    | 0.0000 0.0000 |
| 6 | 1.0 mg/L - 1.5 mg/L | 39.9225  | 0.7272 | 0.3081    | 0.3081 0.3081 |

\* - Normality (Shapiro-Wilk) and homogeneity (Bartlett) tests applied to residuals:

|                              | values  |
|------------------------------|---------|
| p.value Shapiro-Wilk test    | 0.4567  |
| p.value Bartlett test        | 0.0880  |
| coefficient of variation (%) | 18.0200 |
| first value most discrepant  | 10.0000 |
| second value most discrepant | 3.0000  |
| third value most discrepant  | 11.0000 |

\* - The estimated marginal means (EMMs) of factors values:

| Concentration | emmean | SE   | df | lower.CL | upper.CL |
|---------------|--------|------|----|----------|----------|
| Control       | 773.9  | 27.1 | 24 | 717.9    | 830      |
| 0.5 mg/L      | 604.9  | 27.1 | 24 | 548.9    | 661      |
| 1.0 mg/L      | 126.7  | 27.1 | 24 | 70.7     | 183      |
| 1.5 mg/L      | 86.7   | 27.1 | 24 | 30.8     | 143      |

Confidence level used: 0.95

\* - The contrasts between factors in terms of estimated marginal mMeans (EMMs):

| contrast                | estimate | SE   | df | t.ratio | p.value |
|-------------------------|----------|------|----|---------|---------|
| Control - (0.5 mg/L)    | 169.0    | 38.3 | 24 | 4.409   | 0.0002  |
| Control - (1.0 mg/L)    | 647.2    | 38.3 | 24 | 16.883  | <.0001  |
| Control - (1.5 mg/L)    | 687.1    | 38.3 | 24 | 17.924  | <.0001  |
| (0.5 mg/L) - (1.0 mg/L) | 478.2    | 38.3 | 24 | 12.474  | <.0001  |
| (0.5 mg/L) - (1.5 mg/L) | 518.1    | 38.3 | 24 | 13.516  | <.0001  |
| (1.0 mg/L) - (1.5 mg/L) | 39.9     | 38.3 | 24 | 1.041   | 0.3081  |

P value adjustment: fdr method for 6 tests

\* - Calculated p values of pair factor contrasts:

|                         | contrasts.vals | p.vals       |
|-------------------------|----------------|--------------|
| Control - (0.5 mg/L)    | 169.00000      | 2.243085e-04 |
| Control - (1.0 mg/L)    | 647.20529      | 2.415956e-14 |
| Control - (1.5 mg/L)    | 687.12771      | 1.271571e-14 |
| (0.5 mg/L) - (1.0 mg/L) | 478.20529      | 8.367040e-12 |
| (0.5 mg/L) - (1.5 mg/L) | 518.12771      | 2.051241e-12 |
| (1.0 mg/L) - (1.5 mg/L) | 39.92243       | 3.080633e-01 |

```

*   - Benjamini-Krieger-Yekutieli multiple-stages comparison procedure
*   and the decision to reject the null hypothesis of equal means.

```

|                         | contrasts.vals | p.vals       | BYK.pvals    | BYK.rejection |
|-------------------------|----------------|--------------|--------------|---------------|
| Control - (0.5 mg/L)    | 169.00000      | 2.243085e-04 | 8.974355e-05 | TRUE          |
| Control - (1.0 mg/L)    | 647.20529      | 2.415956e-14 | 7.629423e-14 | TRUE          |
| Control - (1.5 mg/L)    | 687.12771      | 1.271571e-14 | 7.629423e-14 | TRUE          |
| (0.5 mg/L) - (1.0 mg/L) | 478.20529      | 8.367040e-12 | 6.275280e-12 | TRUE          |
| (0.5 mg/L) - (1.5 mg/L) | 518.12771      | 2.051241e-12 | 2.734987e-12 | TRUE          |
| (1.0 mg/L) - (1.5 mg/L) | 39.92243       | 3.080633e-01 | 7.420315e-02 | FALSE         |
