# Supplementary material
Source: MDPI journal article supplement (https://www.mdpi.com/2073-4441/15/22/3962)
Supplement: s1 [file s1]

Analysis of variance. One-way ANOVA.

Investigated experimental factor: Cd Concentration  
 Factors name: Control; 0.5 mg/L; 1.0 mg/L; 1.5 mg/L;  
 Investigated experimental response: Dry biomass

\* - The components of observed variance:

|            | df | type I SS | mean square | F value  | p>F    |
|------------|----|-----------|-------------|----------|--------|
| treatments | 3  | 445.5286  | 148.5095    | 214.8827 | <0.001 |
| Residuals  | 24 | 16.5869   | 0.6911      | -        | -      |

\* - Distribution of variables in variance classes:

|   | treatment | mean    | sd     | sem    | tukey | snk | duncan | NA. | scott_knott |
|---|-----------|---------|--------|--------|-------|-----|--------|-----|-------------|
| 1 | Control   | 22.8857 | 1.3656 | 0.3142 | a     | a   | a      | a   | a           |
| 2 | 0.5 mg/L  | 16.6600 | 0.6997 | 0.3142 | b     | b   | b      | b   | b           |
| 3 | 1.0 mg/L  | 13.8086 | 0.3587 | 0.3142 | c     | c   | c      | c   | c           |
| 4 | 1.5 mg/L  | 12.5500 | 0.5305 | 0.3142 | d     | d   | d      | d   | d           |

\* - The raw multiple comparisons test:

|   | pair                | contrast | p(tukey) | p(snk) | p(duncan) | NA     |
|---|---------------------|----------|----------|--------|-----------|--------|
| 1 | Control - 0.5 mg/L  | 6.2257   | 0.0000   | 0.0000 | 0.0000    | 0.0000 |
| 2 | Control - 1.0 mg/L  | 9.0771   | 0.0000   | 0.0000 | 0.0000    | 0.0000 |
| 3 | Control - 1.5 mg/L  | 10.3357  | 0.0000   | 0.0000 | 0.0000    | 0.0000 |
| 4 | 0.5 mg/L - 1.0 mg/L | 2.8514   | 0.0000   | 0.0000 | 0.0000    | 0.0000 |
| 5 | 0.5 mg/L - 1.5 mg/L | 4.1100   | 0.0000   | 0.0000 | 0.0000    | 0.0000 |
| 6 | 1.0 mg/L - 1.5 mg/L | 1.2586   | 0.0427   | 0.0092 | 0.0092    | 0.0092 |

\* - Normality (Shapiro-Wilk) and homogeneity (Bartlett) tests applied to residuals:

|                              | values |
|------------------------------|--------|
| p.value Shapiro-Wilk test    | 0.4367 |
| p.value Bartlett test        | 0.0126 |
| coefficient of variation (%) | 5.0500 |
| first value most discrepant  | 7.0000 |
| second value most discrepant | 1.0000 |
| third value most discrepant  | 4.0000 |

\* - The estimated marginal means (EMMs) of factors values:

| Concentration | emmean | SE    | df | lower.CL | upper.CL |
|---------------|--------|-------|----|----------|----------|
| Control       | 22.9   | 0.314 | 24 | 22.2     | 23.5     |
| 0.5 mg/L      | 16.7   | 0.314 | 24 | 16.0     | 17.3     |
| 1.0 mg/L      | 13.8   | 0.314 | 24 | 13.2     | 14.5     |
| 1.5 mg/L      | 12.6   | 0.314 | 24 | 11.9     | 13.2     |

Confidence level used: 0.95

\* - The contrasts between factors in terms of estimated marginal mMeans (EMMs):

| contrast                | estimate | SE    | df | t.ratio | p.value |
|-------------------------|----------|-------|----|---------|---------|
| Control - (0.5 mg/L)    | 6.23     | 0.444 | 24 | 14.010  | <.0001  |
| Control - (1.0 mg/L)    | 9.08     | 0.444 | 24 | 20.427  | <.0001  |
| Control - (1.5 mg/L)    | 10.34    | 0.444 | 24 | 23.259  | <.0001  |
| (0.5 mg/L) - (1.0 mg/L) | 2.85     | 0.444 | 24 | 6.417   | <.0001  |
| (0.5 mg/L) - (1.5 mg/L) | 4.11     | 0.444 | 24 | 9.249   | <.0001  |
| (1.0 mg/L) - (1.5 mg/L) | 1.26     | 0.444 | 24 | 2.832   | 0.0092  |

P value adjustment: fdr method for 6 tests

\* - Calculated p values of pair factor contrasts:

|                         | contrasts.vals | p.vals       |
|-------------------------|----------------|--------------|
| Control - (0.5 mg/L)    | 6.225714       | 9.506409e-13 |
| Control - (1.0 mg/L)    | 9.077143       | 3.324637e-16 |
| Control - (1.5 mg/L)    | 10.335714      | 3.404996e-17 |
| (0.5 mg/L) - (1.0 mg/L) | 2.851429       | 1.480639e-06 |
| (0.5 mg/L) - (1.5 mg/L) | 4.110000       | 3.310632e-09 |
| (1.0 mg/L) - (1.5 mg/L) | 1.258571       | 9.210695e-03 |

```

*   - Benjamini-Krieger-Yekutieli multiple-stages comparison procedure
*   and the decision to reject the null hypothesis of equal means.
      contrasts.vals      p.vals      BYK.pvals BYK.rejection
Control - (0.5 mg/L)      6.225714 9.506409e-13 1.267521e-12      TRUE
Control - (1.0 mg/L)      9.077143 3.324637e-16 8.311593e-16      TRUE
Control - (1.5 mg/L)     10.335714 3.404996e-17 2.042998e-16      TRUE
(0.5 mg/L) - (1.0 mg/L)   2.851429 1.480639e-06 5.922566e-07      TRUE
(0.5 mg/L) - (1.5 mg/L)   4.110000 3.310632e-09 2.482974e-09      TRUE
(1.0 mg/L) - (1.5 mg/L)   1.258571 9.210695e-03 1.549387e-03      TRUE

```
