# Supplementary material
Source: MDPI journal article supplement (https://www.mdpi.com/2073-4441/15/22/3962)
Supplement: s1 [file s1]

Analysis of variance. One-way ANOVA.

Investigated experimental factor: The type of cation

Factors name: Ni; Cd; Pb;

Investigated experimental response: pH of culture medium

\* - The components of observed variance:

|            | df | type I SS | mean square | F value | p>F   |
|------------|----|-----------|-------------|---------|-------|
| treatments | 2  | 0.0036    | 0.0018      | 1.9947  | 0.165 |
| Residuals  | 18 | 0.0163    | 0.0009      | -       | -     |

\* - Distribution of variables in variance classes:

|   | treatment | mean   | sd     | sem    | tukey | snk | duncan | NA. | scott_knott |
|---|-----------|--------|--------|--------|-------|-----|--------|-----|-------------|
| 1 | Pb        | 9.2814 | 0.0318 | 0.0114 | a     | a   | a      | a   | a           |
| 2 | Ni        | 9.2600 | 0.0283 | 0.0114 | a     | a   | a      | a   | a           |
| 3 | Cd        | 9.2500 | 0.0300 | 0.0114 | a     | a   | a      | a   | a           |

\* - The raw multiple comparisons test:

|   | pair contrast | p(tukey) | p(snk) | p(duncan) | NA     |
|---|---------------|----------|--------|-----------|--------|
| 1 | Pb - Ni       | 0.0214   | 0.3988 | 0.2010    | 0.4020 |
| 2 | Pb - Cd       | 0.0314   | 0.1543 | 0.0804    | 0.2016 |
| 3 | Ni - Cd       | 0.0100   | 0.8110 | 0.5429    | 0.5429 |

\* - Normality (Shapiro-Wilk) and homogeneity (Bartlett) tests applied to residuals:

|                              | values  |
|------------------------------|---------|
| p.value Shapiro-Wilk test    | 0.3247  |
| p.value Bartlett test        | 0.9615  |
| coefficient of variation (%) | 0.3200  |
| first value most discrepant  | 12.0000 |
| second value most discrepant | 7.0000  |
| third value most discrepant  | 17.0000 |

\* - The estimated marginal means (EMMs) of factors values:

|    | Concentration | emmean | SE      | df | lower.CL | upper.CL |
|----|---------------|--------|---------|----|----------|----------|
| Ni |               | 9.260  | 0.01137 | 18 | 9.236    | 9.284    |
| Cd |               | 9.250  | 0.01137 | 18 | 9.226    | 9.274    |
| Pb |               | 9.281  | 0.01137 | 18 | 9.258    | 9.305    |

Confidence level used: 0.95

\* - The contrasts between factors in terms of estimated marginal mMeans (EMMs):

|         | contrast | estimate | SE     | df | t.ratio | p.value |
|---------|----------|----------|--------|----|---------|---------|
| Ni - Cd |          | 0.0100   | 0.0161 | 18 | 0.622   | 0.5418  |
| Ni - Pb |          | -0.0214  | 0.0161 | 18 | -1.333  | 0.2988  |
| Cd - Pb |          | -0.0314  | 0.0161 | 18 | -1.955  | 0.1990  |

P value adjustment: fdr method for 3 tests

\* - Calculated p values of pair factor contrasts:

|         | contrasts.vals | p.vals    |
|---------|----------------|-----------|
| Ni - Cd | 0.01000000     | 0.5417627 |
| Ni - Pb | -0.02142857    | 0.2988425 |
| Cd - Pb | -0.03142857    | 0.1989730 |

\* - Benjamini-Krieger-Yekutieli multiple-stages comparison procedure

\* and the decision to reject the null hypothesis of equal means.

|         | contrasts.vals | p.vals    | BYK.pvals | BYK.rejection |
|---------|----------------|-----------|-----------|---------------|
| Ni - Cd | 0.01000000     | 0.5417627 | 0.7451921 | FALSE         |
| Ni - Pb | -0.02142857    | 0.2988425 | 0.7451921 | FALSE         |
| Cd - Pb | -0.03142857    | 0.1989730 | 0.7451921 | FALSE         |
