# Supplementary material
Source: MDPI journal article supplement (https://www.mdpi.com/2073-4441/15/22/3962)
Supplement: s1 [file s1]

Analysis of variance. One-way ANOVA.

Investigated experimental factor: Pb Concentration  
 Factors name: Control; 0.5 mg/L; 1.0 mg/L; 1.5 mg/L;  
 Investigated experimental response: Total protein

\* - The components of observed variance:

|            | df | type I SS | mean square | F value | p>F    |
|------------|----|-----------|-------------|---------|--------|
| treatments | 3  | 1354108.7 | 451369.553  | 58.639  | <0.001 |
| Residuals  | 24 | 184738.3  | 7697.428    | -       | -      |

\* - Distribution of variables in variance classes:

|   | treatment | mean     | sd       | sem     | tukey | snk | duncan | NA. | scott_knott |
|---|-----------|----------|----------|---------|-------|-----|--------|-----|-------------|
| 1 | Control   | 773.8639 | 87.9719  | 33.1607 | a     | a   | a      | a   | a           |
| 2 | 0.5 mg/L  | 476.7273 | 107.9100 | 33.1607 | b     | b   | b      | b   | b           |
| 3 | 1.0 mg/L  | 255.8789 | 50.7239  | 33.1607 | c     | c   | c      | c   | c           |
| 4 | 1.5 mg/L  | 223.3021 | 93.9850  | 33.1607 | c     | c   | c      | c   | c           |

\* - The raw multiple comparisons test:

|   | pair contrast       | p(tukey) | p(snk) | p(duncan) | NA     |
|---|---------------------|----------|--------|-----------|--------|
| 1 | Control - 0.5 mg/L  | 297.1366 | 0.0000 | 0.0000    | 0.0000 |
| 2 | Control - 1.0 mg/L  | 517.9850 | 0.0000 | 0.0000    | 0.0000 |
| 3 | Control - 1.5 mg/L  | 550.5618 | 0.0000 | 0.0000    | 0.0000 |
| 4 | 0.5 mg/L - 1.0 mg/L | 220.8484 | 0.0005 | 0.0001    | 0.0001 |
| 5 | 0.5 mg/L - 1.5 mg/L | 253.4252 | 0.0001 | 0.0000    | 0.0000 |
| 6 | 1.0 mg/L - 1.5 mg/L | 32.5768  | 0.8981 | 0.4939    | 0.4939 |

\* - Normality (Shapiro-Wilk) and homogeneity (Bartlett) tests applied to residuals:

|                              | values  |
|------------------------------|---------|
| p.value Shapiro-Wilk test    | 0.0457  |
| p.value Bartlett test        | 0.3881  |
| coefficient of variation (%) | 20.2900 |
| first value most discrepant  | 11.0000 |
| second value most discrepant | 27.0000 |
| third value most discrepant  | 3.0000  |

\* - The estimated marginal means (EMMs) of factors values:

| Concentration | emmean | SE   | df | lower.CL | upper.CL |
|---------------|--------|------|----|----------|----------|
| Control       | 774    | 33.2 | 24 | 705      | 842      |
| 0.5 mg/L      | 477    | 33.2 | 24 | 408      | 545      |
| 1.0 mg/L      | 256    | 33.2 | 24 | 187      | 324      |
| 1.5 mg/L      | 223    | 33.2 | 24 | 155      | 292      |

Confidence level used: 0.95

\* - The contrasts between factors in terms of estimated marginal mMeans (EMMs):

| contrast                | estimate | SE   | df | t.ratio | p.value |
|-------------------------|----------|------|----|---------|---------|
| Control - (0.5 mg/L)    | 297.1    | 46.9 | 24 | 6.336   | <.0001  |
| Control - (1.0 mg/L)    | 518.0    | 46.9 | 24 | 11.045  | <.0001  |
| Control - (1.5 mg/L)    | 550.6    | 46.9 | 24 | 11.740  | <.0001  |
| (0.5 mg/L) - (1.0 mg/L) | 220.8    | 46.9 | 24 | 4.709   | 0.0001  |
| (0.5 mg/L) - (1.5 mg/L) | 253.4    | 46.9 | 24 | 5.404   | <.0001  |
| (1.0 mg/L) - (1.5 mg/L) | 32.6     | 46.9 | 24 | 0.695   | 0.4939  |

P value adjustment: fdr method for 6 tests

\* - Calculated p values of pair factor contrasts:

|                         | contrasts.vals | p.vals       |
|-------------------------|----------------|--------------|
| Control - (0.5 mg/L)    | 297.13657      | 3.000257e-06 |
| Control - (1.0 mg/L)    | 517.98500      | 2.044233e-10 |
| Control - (1.5 mg/L)    | 550.56171      | 1.178632e-10 |
| (0.5 mg/L) - (1.0 mg/L) | 220.84843      | 1.043589e-04 |
| (0.5 mg/L) - (1.5 mg/L) | 253.42514      | 2.249828e-05 |
| (1.0 mg/L) - (1.5 mg/L) | 32.57671       | 4.939428e-01 |

```

*   - Benjamini-Krieger-Yekutieli multiple-stages comparison procedure
*   and the decision to reject the null hypothesis of equal means.

```

|                         | contrasts.vals | p.vals       | BYK.pvals    | BYK.rejection |
|-------------------------|----------------|--------------|--------------|---------------|
| Control - (0.5 mg/L)    | 297.13657      | 3.000257e-06 | 4.000355e-06 | TRUE          |
| Control - (1.0 mg/L)    | 517.98500      | 2.044233e-10 | 7.071792e-10 | TRUE          |
| Control - (1.5 mg/L)    | 550.56171      | 1.178632e-10 | 7.071792e-10 | TRUE          |
| (0.5 mg/L) - (1.0 mg/L) | 220.84843      | 1.043589e-04 | 4.174793e-05 | TRUE          |
| (0.5 mg/L) - (1.5 mg/L) | 253.42514      | 2.249828e-05 | 1.687409e-05 | TRUE          |
| (1.0 mg/L) - (1.5 mg/L) | 32.57671       | 4.939428e-01 | 1.626769e-01 | FALSE         |
