# Supplementary material
Source: MDPI journal article supplement (https://www.mdpi.com/2073-4441/15/22/3962)
Supplement: s1 [file s1]

Analysis of variance. One-way ANOVA.

Investigated experimental factor: Pb Concentration  
 Factors name: Control; 0.5 mg/L; 1.0 mg/L; 1.5 mg/L;  
 Investigated experimental response: pH of culture medium

\* - The components of observed variance:

|            | df | type I SS | mean square | F value | p>F    |
|------------|----|-----------|-------------|---------|--------|
| treatments | 3  | 0.0376    | 0.0125      | 4.2883  | 0.0147 |
| Residuals  | 24 | 0.0702    | 0.0029      | -       | -      |

\* - Distribution of variables in variance classes:

|   | treatment | mean   | sd     | sem    | tukey | snk | duncan | NA. | scott_knott |
|---|-----------|--------|--------|--------|-------|-----|--------|-----|-------------|
| 1 | Control   | 9.3600 | 0.0597 | 0.0204 | a     | a   | a      | a   | a           |
| 2 | 0.5 mg/L  | 9.3314 | 0.0598 | 0.0204 | ab    | ab  | ab     | ab  | a           |
| 3 | 1.0 mg/L  | 9.2814 | 0.0318 | 0.0204 | ab    | b   | b      | ab  | b           |
| 4 | 1.5 mg/L  | 9.2700 | 0.0594 | 0.0204 | b     | b   | b      | b   | b           |

\* - The raw multiple comparisons test:

|   | pair contrast       | p(tukey) | p(snk) | p(duncan) | NA     |
|---|---------------------|----------|--------|-----------|--------|
| 1 | Control - 0.5 mg/L  | 0.0286   | 0.7557 | 0.3314    | 0.6628 |
| 2 | Control - 1.0 mg/L  | 0.0786   | 0.0538 | 0.0306    | 0.0590 |
| 3 | Control - 1.5 mg/L  | 0.0900   | 0.0226 | 0.0226    | 0.0076 |
| 4 | 0.5 mg/L - 1.0 mg/L | 0.0500   | 0.3293 | 0.0959    | 0.2877 |
| 5 | 0.5 mg/L - 1.5 mg/L | 0.0614   | 0.1729 | 0.1052    | 0.1752 |
| 6 | 1.0 mg/L - 1.5 mg/L | 0.0114   | 0.9786 | 0.6962    | 0.6962 |

\* - Normality (Shapiro-Wilk) and homogeneity (Bartlett) tests applied to residuals:

|                              | values  |
|------------------------------|---------|
| p.value Shapiro-Wilk test    | 0.0668  |
| p.value Bartlett test        | 0.4531  |
| coefficient of variation (%) | 0.5800  |
| first value most discrepant  | 10.0000 |
| second value most discrepant | 7.0000  |
| third value most discrepant  | 24.0000 |

\* - The estimated marginal means (EMMs) of factors values:

|          | Concentration | emmean | SE      | df | lower.CL | upper.CL |
|----------|---------------|--------|---------|----|----------|----------|
| Control  |               | 9.360  | 0.02044 | 24 | 9.318    | 9.402    |
| 0.5 mg/L |               | 9.331  | 0.02044 | 24 | 9.289    | 9.374    |
| 1.0 mg/L |               | 9.281  | 0.02044 | 24 | 9.239    | 9.324    |
| 1.5 mg/L |               | 9.270  | 0.02044 | 24 | 9.228    | 9.312    |

Confidence level used: 0.95

\* - The contrasts between factors in terms of estimated marginal mMeans (EMMs):

| contrast                | estimate | SE     | df | t.ratio | p.value |
|-------------------------|----------|--------|----|---------|---------|
| Control - (0.5 mg/L)    | 0.0286   | 0.0289 | 24 | 0.989   | 0.3993  |
| Control - (1.0 mg/L)    | 0.0786   | 0.0289 | 24 | 2.718   | 0.0360  |
| Control - (1.5 mg/L)    | 0.0900   | 0.0289 | 24 | 3.114   | 0.0284  |
| (0.5 mg/L) - (1.0 mg/L) | 0.0500   | 0.0289 | 24 | 1.730   | 0.1447  |
| (0.5 mg/L) - (1.5 mg/L) | 0.0614   | 0.0289 | 24 | 2.125   | 0.0881  |
| (1.0 mg/L) - (1.5 mg/L) | 0.0114   | 0.0289 | 24 | 0.395   | 0.6960  |

P value adjustment: fdr method for 6 tests

\* - Calculated p values of pair factor contrasts:

|                         | contrasts.vals | p.vals     |
|-------------------------|----------------|------------|
| Control - (0.5 mg/L)    | 0.02857143     | 0.39930419 |
| Control - (1.0 mg/L)    | 0.07857143     | 0.03596271 |
| Control - (1.5 mg/L)    | 0.09000000     | 0.02836390 |
| (0.5 mg/L) - (1.0 mg/L) | 0.05000000     | 0.14472604 |
| (0.5 mg/L) - (1.5 mg/L) | 0.06142857     | 0.08809546 |
| (1.0 mg/L) - (1.5 mg/L) | 0.01142857     | 0.69603063 |

```

*   - Benjamini-Krieger-Yekutieli multiple-stages comparison procedure
*   and the decision to reject the null hypothesis of equal means.
      contrasts.vals      p.vals BYK.pvals BYK.rejection
Control - (0.5 mg/L)      0.02857143 0.39930419 0.2658944      FALSE
Control - (1.0 mg/L)      0.07857143 0.03596271 0.1751514      FALSE
Control - (1.5 mg/L)      0.09000000 0.02836390 0.1751514      FALSE
(0.5 mg/L) - (1.0 mg/L)   0.05000000 0.14472604 0.1751514      FALSE
(0.5 mg/L) - (1.5 mg/L)   0.06142857 0.08809546 0.1751514      FALSE
(1.0 mg/L) - (1.5 mg/L)   0.01142857 0.69603063 0.3816342      FALSE

```
