# Supplementary material
Source: MDPI journal article supplement (https://www.mdpi.com/2073-4441/15/22/3962)
Supplement: s1 [file s1]

Analysis of variance. One-way ANOVA.

Investigated experimental factor: Pb Concentration  
 Factors name: Control; 0.5 mg/L; 1.0 mg/L; 1.5 mg/L;  
 Investigated experimental response: Optical density

\* - The components of observed variance:

|            | df | type I SS | mean square | F value  | p>F    |
|------------|----|-----------|-------------|----------|--------|
| treatments | 3  | 12.4038   | 4.1346      | 121.2121 | <0.001 |
| Residuals  | 24 | 0.8186    | 0.0341      | -        | -      |

\* - Distribution of variables in variance classes:

|   | treatment | mean   | sd     | sem    | tukey | snk | duncan | NA. | scott_knott |
|---|-----------|--------|--------|--------|-------|-----|--------|-----|-------------|
| 1 | Control   | 1.9309 | 0.2400 | 0.0698 | a     | a   | a      | a   | a           |
| 2 | 0.5 mg/L  | 0.7614 | 0.2303 | 0.0698 | b     | b   | b      | b   | b           |
| 3 | 1.0 mg/L  | 0.3814 | 0.0788 | 0.0698 | c     | c   | c      | c   | c           |
| 4 | 1.5 mg/L  | 0.2349 | 0.1400 | 0.0698 | c     | c   | c      | c   | c           |

\* - The raw multiple comparisons test:

|   | pair contrast       | p(tukey) | p(snk) | p(duncan) | NA     |
|---|---------------------|----------|--------|-----------|--------|
| 1 | Control - 0.5 mg/L  | 1.1695   | 0.0000 | 0.0000    | 0.0000 |
| 2 | Control - 1.0 mg/L  | 1.5495   | 0.0000 | 0.0000    | 0.0000 |
| 3 | Control - 1.5 mg/L  | 1.6960   | 0.0000 | 0.0000    | 0.0000 |
| 4 | 0.5 mg/L - 1.0 mg/L | 0.3800   | 0.0040 | 0.0008    | 0.0008 |
| 5 | 0.5 mg/L - 1.5 mg/L | 0.5265   | 0.0001 | 0.0001    | 0.0000 |
| 6 | 1.0 mg/L - 1.5 mg/L | 0.1465   | 0.4622 | 0.1508    | 0.1508 |

\* - Normality (Shapiro-Wilk) and homogeneity (Bartlett) tests applied to residuals:

|                              | values  |
|------------------------------|---------|
| p.value Shapiro-Wilk test    | 0.5874  |
| p.value Bartlett test        | 0.0644  |
| coefficient of variation (%) | 22.3300 |
| first value most discrepant  | 1.0000  |
| second value most discrepant | 14.0000 |
| third value most discrepant  | 12.0000 |

\* - The estimated marginal means (EMMs) of factors values:

|          | Concentration | emmean | SE     | df | lower.CL | upper.CL |
|----------|---------------|--------|--------|----|----------|----------|
| Control  |               | 1.931  | 0.0698 | 24 | 1.7868   | 2.075    |
| 0.5 mg/L |               | 0.761  | 0.0698 | 24 | 0.6174   | 0.906    |
| 1.0 mg/L |               | 0.381  | 0.0698 | 24 | 0.2374   | 0.526    |
| 1.5 mg/L |               | 0.235  | 0.0698 | 24 | 0.0908   | 0.379    |

Confidence level used: 0.95

\* - The contrasts between factors in terms of estimated marginal mMeans (EMMs):

| contrast                | estimate | SE     | df | t.ratio | p.value |
|-------------------------|----------|--------|----|---------|---------|
| Control - (0.5 mg/L)    | 1.169    | 0.0987 | 24 | 11.846  | <.0001  |
| Control - (1.0 mg/L)    | 1.549    | 0.0987 | 24 | 15.695  | <.0001  |
| Control - (1.5 mg/L)    | 1.696    | 0.0987 | 24 | 17.180  | <.0001  |
| (0.5 mg/L) - (1.0 mg/L) | 0.380    | 0.0987 | 24 | 3.849   | 0.0009  |
| (0.5 mg/L) - (1.5 mg/L) | 0.527    | 0.0987 | 24 | 5.334   | <.0001  |
| (1.0 mg/L) - (1.5 mg/L) | 0.147    | 0.0987 | 24 | 1.485   | 0.1506  |

P value adjustment: fdr method for 6 tests

\* - Calculated p values of pair factor contrasts:

|                         | contrasts.vals | p.vals       |
|-------------------------|----------------|--------------|
| Control - (0.5 mg/L)    | 1.1694286      | 3.265623e-11 |
| Control - (1.0 mg/L)    | 1.5494286      | 1.209851e-13 |
| Control - (1.5 mg/L)    | 1.6960000      | 3.279399e-14 |
| (0.5 mg/L) - (1.0 mg/L) | 0.3800000      | 9.246837e-04 |
| (0.5 mg/L) - (1.5 mg/L) | 0.5265714      | 2.682652e-05 |
| (1.0 mg/L) - (1.5 mg/L) | 0.1465714      | 1.506389e-01 |

```

*   - Benjamini-Krieger-Yekutieli multiple-stages comparison procedure
*   and the decision to reject the null hypothesis of equal means.

```

|                         | contrasts.vals | p.vals       | BYK.pvals    | BYK.rejection |
|-------------------------|----------------|--------------|--------------|---------------|
| Control - (0.5 mg/L)    | 1.1694286      | 3.265623e-11 | 4.354164e-11 | TRUE          |
| Control - (1.0 mg/L)    | 1.5494286      | 1.209851e-13 | 3.024627e-13 | TRUE          |
| Control - (1.5 mg/L)    | 1.6960000      | 3.279399e-14 | 1.967639e-13 | TRUE          |
| (0.5 mg/L) - (1.0 mg/L) | 0.3800000      | 9.246837e-04 | 3.702158e-04 | TRUE          |
| (0.5 mg/L) - (1.5 mg/L) | 0.5265714      | 2.682652e-05 | 2.012043e-05 | TRUE          |
| (1.0 mg/L) - (1.5 mg/L) | 0.1465714      | 1.506389e-01 | 2.955927e-02 | TRUE          |
