# Supplementary material
Source: MDPI journal article supplement (https://www.mdpi.com/2073-4441/15/22/3962)
Supplement: s1 [file s1]

Analysis of variance. One-way ANOVA.

Investigated experimental factor: The type of cation  
Factors name: Ni; Cd; Pb;  
Investigated experimental response: Dry biomass

\* - The components of observed variance:

|            | df | type I SS | mean square | F value  | p>F    |
|------------|----|-----------|-------------|----------|--------|
| treatments | 2  | 47.0697   | 23.5349     | 136.6994 | <0.001 |
| Residuals  | 18 | 3.0990    | 0.1722      | -        | -      |

\* - Distribution of variables in variance classes:

|   | treatment | mean    | sd     | sem    | tukey | snk | duncan | NA. | scott_knott |
|---|-----------|---------|--------|--------|-------|-----|--------|-----|-------------|
| 1 | Pb        | 17.3786 | 0.3696 | 0.1568 | a     | a   | a      | a   | a           |
| 2 | Ni        | 16.3200 | 0.5012 | 0.1568 | b     | b   | b      | b   | b           |
| 3 | Cd        | 13.8086 | 0.3587 | 0.1568 | c     | c   | c      | c   | c           |

\* - The raw multiple comparisons test:

|   | pair contrast | p(tukey) | p(snk) | p(duncan) | NA          |
|---|---------------|----------|--------|-----------|-------------|
| 1 | Pb - Ni       | 1.0586   | 4e-04  | 2e-04     | 2e-04 2e-04 |
| 2 | Pb - Cd       | 3.5700   | 0e+00  | 0e+00     | 0e+00 0e+00 |
| 3 | Ni - Cd       | 2.5114   | 0e+00  | 0e+00     | 0e+00 0e+00 |

\* - Normality (Shapiro-Wilk) and homogeneity (Bartlett) tests applied to residuals:

|                              | values  |
|------------------------------|---------|
| p.value Shapiro-Wilk test    | 0.0706  |
| p.value Bartlett test        | 0.6677  |
| coefficient of variation (%) | 2.6200  |
| first value most discrepant  | 6.0000  |
| second value most discrepant | 10.0000 |
| third value most discrepant  | 15.0000 |

\* - The estimated marginal means (EMMs) of factors values:

| Concentration | emmean | SE    | df | lower.CL | upper.CL |
|---------------|--------|-------|----|----------|----------|
| Ni            | 16.3   | 0.157 | 18 | 16.0     | 16.6     |
| Cd            | 13.8   | 0.157 | 18 | 13.5     | 14.1     |
| Pb            | 17.4   | 0.157 | 18 | 17.0     | 17.7     |

Confidence level used: 0.95

\* - The contrasts between factors in terms of estimated marginal mMeans (EMMs):

| contrast | estimate | SE    | df | t.ratio | p.value |
|----------|----------|-------|----|---------|---------|
| Ni - Cd  | 2.51     | 0.222 | 18 | 11.324  | <.0001  |
| Ni - Pb  | -1.06    | 0.222 | 18 | -4.773  | 0.0002  |
| Cd - Pb  | -3.57    | 0.222 | 18 | -16.096 | <.0001  |

P value adjustment: fdr method for 3 tests

\* - Calculated p values of pair factor contrasts:

|         | contrasts.vals | p.vals       |
|---------|----------------|--------------|
| Ni - Cd | 2.511429       | 1.915185e-09 |
| Ni - Pb | -1.058571      | 1.521429e-04 |
| Cd - Pb | -3.570000      | 1.181069e-11 |

\* - Benjamini-Krieger-Yekutieli multiple-stages comparison procedure

\* and the decision to reject the null hypothesis of equal means.

|         | contrasts.vals | p.vals       | BYK.pvals    | BYK.rejection |
|---------|----------------|--------------|--------------|---------------|
| Ni - Cd | 2.511429       | 1.915185e-09 | 1.915185e-09 | TRUE          |
| Ni - Pb | -1.058571      | 1.521429e-04 | 5.072203e-05 | TRUE          |
| Cd - Pb | -3.570000      | 1.181069e-11 | 3.543206e-11 | TRUE          |
