# Supplementary material
Source: MDPI journal article supplement (https://www.mdpi.com/2073-4441/15/22/3962)
Supplement: s1 [file s1]

Analysis of variance. One-way ANOVA.

Investigated experimental factor: Ni Concentration  
 Factors name: Control; 0.5 mg/L; 1.0 mg/L; 1.5 mg/L;  
 Investigated experimental response: Dry biomass

\* - The components of observed variance:

|            | df | type I SS | mean square | F value  | p>F    |
|------------|----|-----------|-------------|----------|--------|
| treatments | 3  | 263.8465  | 87.9488     | 119.8536 | <0.001 |
| Residuals  | 24 | 17.6113   | 0.7338      | -        | -      |

\* - Distribution of variables in variance classes:

|   | treatment | mean    | sd     | sem    | tukey | snk | duncan | NA. | scott_knott |
|---|-----------|---------|--------|--------|-------|-----|--------|-----|-------------|
| 1 | Control   | 22.8857 | 1.3656 | 0.3238 | a     | a   | a      | a   | a           |
| 2 | 0.5 mg/L  | 18.8614 | 0.8692 | 0.3238 | b     | b   | b      | b   | b           |
| 3 | 1.0 mg/L  | 16.3200 | 0.5012 | 0.3238 | c     | c   | c      | c   | c           |
| 4 | 1.5 mg/L  | 14.7700 | 0.2523 | 0.3238 | d     | d   | d      | d   | d           |

\* - The raw multiple comparisons test:

|   | pair                | contrast | p(tukey) | p(snk) | p(duncan) | NA     |
|---|---------------------|----------|----------|--------|-----------|--------|
| 1 | Control - 0.5 mg/L  | 4.0243   | 0.0000   | 0.0000 | 0.0000    | 0.0000 |
| 2 | Control - 1.0 mg/L  | 6.5657   | 0.0000   | 0.0000 | 0.0000    | 0.0000 |
| 3 | Control - 1.5 mg/L  | 8.1157   | 0.0000   | 0.0000 | 0.0000    | 0.0000 |
| 4 | 0.5 mg/L - 1.0 mg/L | 2.5414   | 0.0001   | 0.0000 | 0.0000    | 0.0000 |
| 5 | 0.5 mg/L - 1.5 mg/L | 4.0914   | 0.0000   | 0.0000 | 0.0000    | 0.0000 |
| 6 | 1.0 mg/L - 1.5 mg/L | 1.5500   | 0.0122   | 0.0024 | 0.0024    | 0.0024 |

\* - Normality (Shapiro-Wilk) and homogeneity (Bartlett) tests applied to residuals:

|                              | values |
|------------------------------|--------|
| p.value Shapiro-Wilk test    | 0.6713 |
| p.value Bartlett test        | 0.0025 |
| coefficient of variation (%) | 4.7000 |
| first value most discrepant  | 7.0000 |
| second value most discrepant | 1.0000 |
| third value most discrepant  | 9.0000 |

\* - The estimated marginal means (EMMs) of factors values:

| Concentration | emmean | SE    | df | lower.CL | upper.CL |
|---------------|--------|-------|----|----------|----------|
| Control       | 22.9   | 0.324 | 24 | 22.2     | 23.6     |
| 0.5 mg/L      | 18.9   | 0.324 | 24 | 18.2     | 19.5     |
| 1.0 mg/L      | 16.3   | 0.324 | 24 | 15.7     | 17.0     |
| 1.5 mg/L      | 14.8   | 0.324 | 24 | 14.1     | 15.4     |

Confidence level used: 0.95

\* - The contrasts between factors in terms of estimated marginal mMeans (EMMs):

| contrast                | estimate | SE    | df | t.ratio | p.value |
|-------------------------|----------|-------|----|---------|---------|
| Control - (0.5 mg/L)    | 4.02     | 0.458 | 24 | 8.789   | <.0001  |
| Control - (1.0 mg/L)    | 6.57     | 0.458 | 24 | 14.339  | <.0001  |
| Control - (1.5 mg/L)    | 8.12     | 0.458 | 24 | 17.724  | <.0001  |
| (0.5 mg/L) - (1.0 mg/L) | 2.54     | 0.458 | 24 | 5.550   | <.0001  |
| (0.5 mg/L) - (1.5 mg/L) | 4.09     | 0.458 | 24 | 8.936   | <.0001  |
| (1.0 mg/L) - (1.5 mg/L) | 1.55     | 0.458 | 24 | 3.385   | 0.0024  |

P value adjustment: fdr method for 6 tests

\* - Calculated p values of pair factor contrasts:

|                         | contrasts.vals | p.vals       |
|-------------------------|----------------|--------------|
| Control - (0.5 mg/L)    | 4.024286       | 8.613653e-09 |
| Control - (1.0 mg/L)    | 6.565714       | 8.650240e-13 |
| Control - (1.5 mg/L)    | 8.115714       | 1.634345e-14 |
| (0.5 mg/L) - (1.0 mg/L) | 2.541429       | 1.247106e-05 |
| (0.5 mg/L) - (1.5 mg/L) | 4.091429       | 8.443198e-09 |
| (1.0 mg/L) - (1.5 mg/L) | 1.550000       | 2.445273e-03 |

```

*   - Benjamini-Krieger-Yekutieli multiple-stages comparison procedure
*   and the decision to reject the null hypothesis of equal means.
      contrasts.vals      p.vals      BYK.pvals BYK.rejection
Control - (0.5 mg/L)      4.024286 8.613653e-09 1.125760e-08      TRUE
Control - (1.0 mg/L)      6.565714 8.650240e-13 2.162560e-12      TRUE
Control - (1.5 mg/L)      8.115714 1.634345e-14 9.806073e-14      TRUE
(0.5 mg/L) - (1.0 mg/L)   2.541429 1.247106e-05 4.988486e-06      TRUE
(0.5 mg/L) - (1.5 mg/L)   4.091429 8.443198e-09 1.125760e-08      TRUE
(1.0 mg/L) - (1.5 mg/L)   1.550000 2.445273e-03 4.085445e-04      TRUE

```
