# Supplementary material
Source: MDPI journal article supplement (https://www.mdpi.com/2073-4441/15/22/3962)
Supplement: s1 [file s1]

Analysis of variance. One-way ANOVA.

Investigated experimental factor: Cd Concentration  
 Factors name: Control; 0.5 mg/L; 1.0 mg/L; 1.5 mg/L;  
 Investigated experimental response: Optical density

\* - The components of observed variance:

|            | df | type I SS | mean square | F value  | p>F    |
|------------|----|-----------|-------------|----------|--------|
| treatments | 3  | 12.4128   | 4.1376      | 122.2471 | <0.001 |
| Residuals  | 24 | 0.8123    | 0.0338      | -        | -      |

\* - Distribution of variables in variance classes:

|   | treatment | mean   | sd     | sem    | tukey | snk | duncan | NA. | scott_knott |
|---|-----------|--------|--------|--------|-------|-----|--------|-----|-------------|
| 1 | Control   | 1.9309 | 0.2400 | 0.0695 | a     | a   | a      | a   | a           |
| 2 | 0.5 mg/L  | 0.7600 | 0.2274 | 0.0695 | b     | b   | b      | b   | b           |
| 3 | 1.0 mg/L  | 0.3800 | 0.0800 | 0.0695 | c     | c   | c      | c   | c           |
| 4 | 1.5 mg/L  | 0.2350 | 0.1402 | 0.0695 | c     | c   | c      | c   | c           |

\* - The raw multiple comparisons test:

|   | pair contrast       | p(tukey) | p(snk) | p(duncan) | NA     |
|---|---------------------|----------|--------|-----------|--------|
| 1 | Control - 0.5 mg/L  | 1.1709   | 0.0000 | 0.0000    | 0.0000 |
| 2 | Control - 1.0 mg/L  | 1.5509   | 0.0000 | 0.0000    | 0.0000 |
| 3 | Control - 1.5 mg/L  | 1.6959   | 0.0000 | 0.0000    | 0.0000 |
| 4 | 0.5 mg/L - 1.0 mg/L | 0.3800   | 0.0038 | 0.0007    | 0.0014 |
| 5 | 0.5 mg/L - 1.5 mg/L | 0.5250   | 0.0001 | 0.0001    | 0.0000 |
| 6 | 1.0 mg/L - 1.5 mg/L | 0.1450   | 0.4673 | 0.1531    | 0.1531 |

\* - Normality (Shapiro-Wilk) and homogeneity (Bartlett) tests applied to residuals:

|                              | values  |
|------------------------------|---------|
| p.value Shapiro-Wilk test    | 0.9595  |
| p.value Bartlett test        | 0.0710  |
| coefficient of variation (%) | 22.2600 |
| first value most discrepant  | 10.0000 |
| second value most discrepant | 1.0000  |
| third value most discrepant  | 7.0000  |

\* - The estimated marginal means (EMMs) of factors values:

|          | Concentration | emmean | SE     | df | lower.CL | upper.CL |
|----------|---------------|--------|--------|----|----------|----------|
| Control  |               | 1.931  | 0.0695 | 24 | 1.7873   | 2.074    |
| 0.5 mg/L |               | 0.760  | 0.0695 | 24 | 0.6165   | 0.904    |
| 1.0 mg/L |               | 0.380  | 0.0695 | 24 | 0.2365   | 0.524    |
| 1.5 mg/L |               | 0.235  | 0.0695 | 24 | 0.0915   | 0.379    |

Confidence level used: 0.95

\* - The contrasts between factors in terms of estimated marginal mMeans (EMMs):

| contrast                | estimate | SE     | df | t.ratio | p.value |
|-------------------------|----------|--------|----|---------|---------|
| Control - (0.5 mg/L)    | 1.171    | 0.0983 | 24 | 11.906  | <.0001  |
| Control - (1.0 mg/L)    | 1.551    | 0.0983 | 24 | 15.771  | <.0001  |
| Control - (1.5 mg/L)    | 1.696    | 0.0983 | 24 | 17.245  | <.0001  |
| (0.5 mg/L) - (1.0 mg/L) | 0.380    | 0.0983 | 24 | 3.864   | 0.0009  |
| (0.5 mg/L) - (1.5 mg/L) | 0.525    | 0.0983 | 24 | 5.339   | <.0001  |
| (1.0 mg/L) - (1.5 mg/L) | 0.145    | 0.0983 | 24 | 1.475   | 0.1533  |

P value adjustment: fdr method for 6 tests

\* - Calculated p values of pair factor contrasts:

|                         | contrasts.vals | p.vals       |
|-------------------------|----------------|--------------|
| Control - (0.5 mg/L)    | 1.170857       | 2.938873e-11 |
| Control - (1.0 mg/L)    | 1.550857       | 1.088629e-13 |
| Control - (1.5 mg/L)    | 1.695857       | 3.013156e-14 |
| (0.5 mg/L) - (1.0 mg/L) | 0.380000       | 8.904681e-04 |
| (0.5 mg/L) - (1.5 mg/L) | 0.525000       | 2.650524e-05 |
| (1.0 mg/L) - (1.5 mg/L) | 0.145000       | 1.533433e-01 |

```

*   - Benjamini-Krieger-Yekutieli multiple-stages comparison procedure
*   and the decision to reject the null hypothesis of equal means.
      contrasts.vals      p.vals      BYK.pvals BYK.rejection
Control - (0.5 mg/L)      1.170857 2.938873e-11 3.918498e-11      TRUE
Control - (1.0 mg/L)      1.550857 1.088629e-13 2.721572e-13      TRUE
Control - (1.5 mg/L)      1.695857 3.013156e-14 1.807894e-13      TRUE
(0.5 mg/L) - (1.0 mg/L)    0.380000 8.904681e-04 3.565047e-04      TRUE
(0.5 mg/L) - (1.5 mg/L)    0.525000 2.650524e-05 1.987946e-05      TRUE
(1.0 mg/L) - (1.5 mg/L)    0.145000 1.533433e-01 3.018605e-02      TRUE

```
